# Supplementary material for: A Role for Myosin VI in the Localization of Axonal Proteins
Source: PubMed Central journal article supplement (PMC3046960; doi:10.1371/journal.pbio.1001021), 2011-03-01

Figure S9. Intracellular and surface CD8-MVIBD localize differentially.

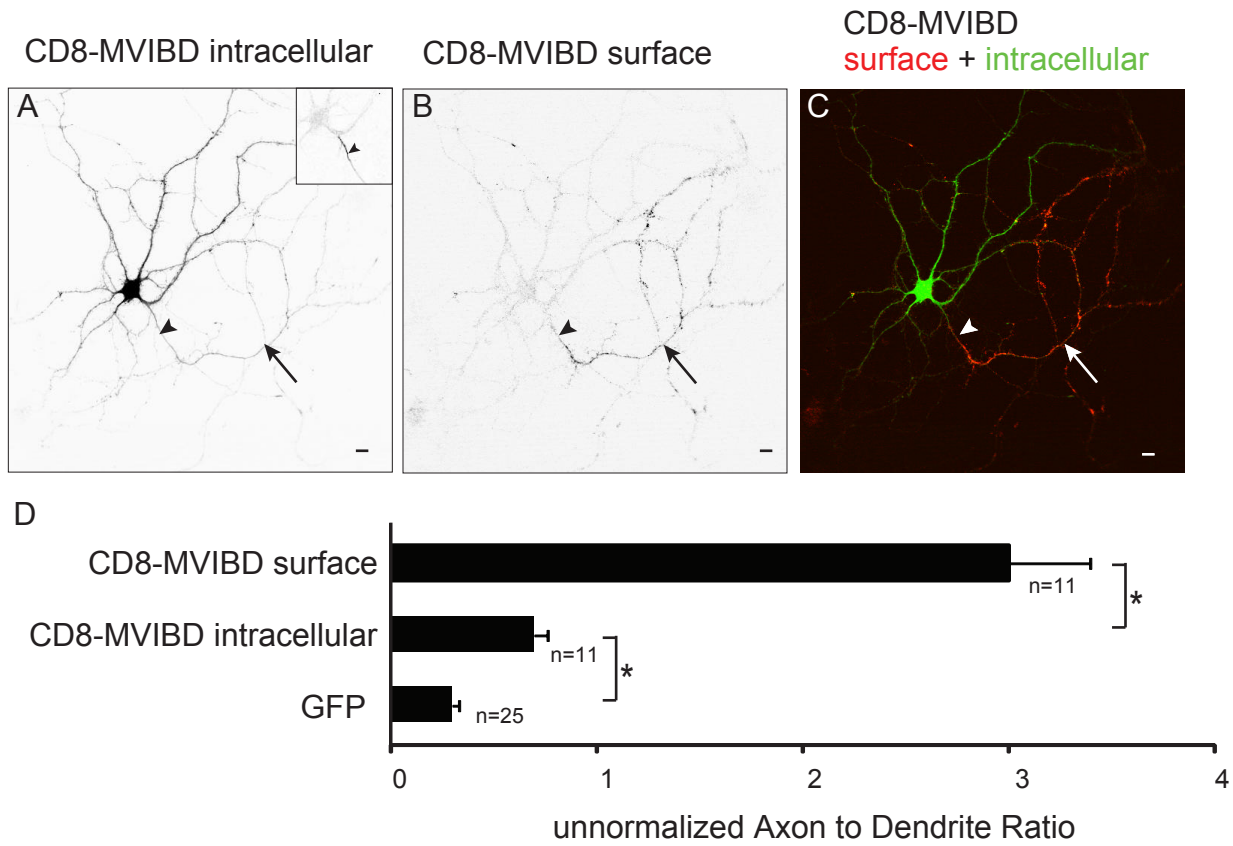

Supplement: pbio.1001021.s009.pdf [file pbio.1001021.s009.pdf]
