# Supplementary material for: A Role for Myosin VI in the Localization of Axonal Proteins
Source: PubMed Central journal article supplement (PMC3046960; doi:10.1371/journal.pbio.1001021), 2011-03-01

Figure S10. Acid wash does not affect the localization of endogenous proteins.

Internalized CD8-MVIBD

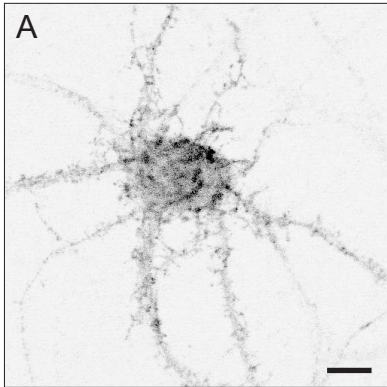

GFP

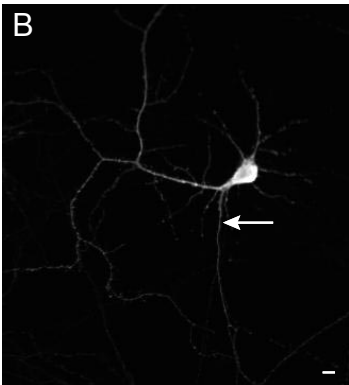

Endo. Ankyrin

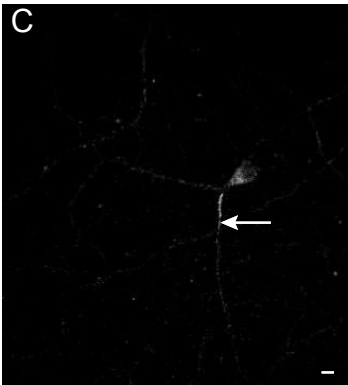

Endo. Nav1.2

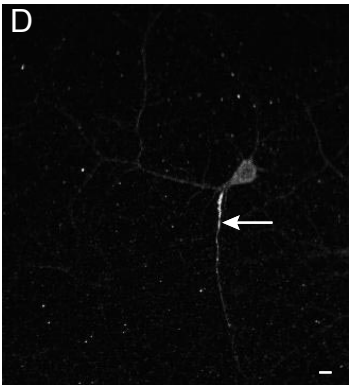

Supplement: pbio.1001021.s010.pdf [file pbio.1001021.s010.pdf]
